# Supplementary material for: Hydrogen production with ultrahigh efficiency under visible light by graphene well-wrapped UiO-66-NH2 octahedrons
Source: Royal Society of Chemistry journal article supplement (doi:10.1039/c7ta06341e), 2017-01-01
Supplement: c7ta06341e1.pdf [file c7ta06341e1.pdf]

Supplementary Materials for

**Hydrogen production with ultrahigh efficiency under visible light by  
graphene well-wrapped UiO-66-NH<sub>2</sub> octahedrons**

Yang Wang\*, Yu Yu, Rui Li, Huijin Liu, Wei Zhang, Lianjie Ling, Wubiao Duan, Bo Liu\*

Department of Chemistry, School of Science, Beijing Jiaotong University corresponding author,

E-mail: boliu@bjtu.edu.cn

**Section 1. Materials and methods**

All chemicals were obtained from commercial sources without further purification. Zirconium chloride, 2-aminoterephthalic acid and graphene oxide was purchased from Aladdin, Afa Aesar and Hengqiu Tech. Inc. respectively. GO sheets were grounded to powders under anhydrous environment before use.

**Section 2. Experimental Section**

**2.1 Preparation of UiO-66-NH<sub>2</sub> octahedrons**

In a typical synthesis<sup>S2</sup> with some modification, ZrCl<sub>4</sub> (0.233g) and 2-aminoterephthalic acid (BDC-NH<sub>2</sub>) (0.181g) were first dissolved in 102.1 mL N,N-dimethylformamide (DMF). Then acetic acid (22.9mL) was added into the solution, following the ultrasonic treatment for 20 min. The solution was then transferred into a 200mL Teflon-lined stainless steel autoclave and heated to 120°C for 16h. After cooling to room temperature, the products were collected by centrifugation and wash three times with DMF to remove the excess reactants, then washed with methanol for three times to remove DMF, and finally heated at 150 °C under vacuum for 12h.

**2.2 Preparation of GOWU6N**

Take 50wt% GOWU6N for example, 0.1g UiO-66-NH<sub>2</sub> octahedrons, 30ml deionized water and 1mL HCl were mixed in the glass vial and ultrasonic for 10min. Subsequence 0.05g GO powder was added to the system ultrasonic for 10min and stirred for 2h. Then products were collected by centrifugation at 5000 rpm and dried in air at 80 °C. Other samples (1wt%, 10wt% and 200wt%) were prepared in the same way.

### **2.3 Preparation of DGO/U6N, CGO/U6N**

0.1g UiO-66-NH<sub>2</sub> octahedrons, 30mL DMF were mixed in the glass vial ultrasonic for 10min and then 0.05g GO sheet added ultrasonic for 10min and stirred for 2h. Then products were washed with methanol for three times and collected after being dried at 80 °C. The preparation of CGO/U6N were the same as UiO-66-NH<sub>2</sub> octahedrons, the only difference is before adding acetic acid, GO sheets were introduced in the solution of ZrCl<sub>4</sub>, BDC-NH<sub>2</sub> and DMF and stirred for 12h. Finally, the three kind dried powers together with 30ml deionized water were transferred to 50 ml Teflon-lined stainless steel autoclave and heated to 120°C for 12h and dried at 80 °C. The samples were renamed as RGOWU6N, RDGO/U6N and RCGO/U6N respectively.

### **2.4 Preparation of ZIF-8 and graphene wrapped ZIF-8**

The preparation of ZIF-8 was according to the previous method with some modifications <sup>s8</sup>. 0.375g Zn(NO<sub>3</sub>)<sub>2</sub>·6H<sub>2</sub>O and 0.205g 2-methyl-imidazole were dissolved into 50ml methanol respectively. Then the two solutions mixed with stirring for 2h. After that, the products were separated via centrifugation and then

dried at 80 °C. As mentioned before, in the preparation of RGOWU6N, graphene wrapped ZIF-8 was prepared by mixing 0.06g ZIF-8, 0.03g GO powders 1 ml HCl in 30ml deionized water. After stirring for 2h, the samples were gained by centrifugation and dried at 80 °C.

## 2.5 Photocatalytic hydrogen production

Photocatalytic H<sub>2</sub> production reactions were carried out in a 200mL closed quartz flask reactor. The reactor was degassed for 1h to drive away the residual air. The photocatalytic hydrogen production was initiated by irradiating the suspension with a 300W xenon lamp (PLS-SXE300C) coupled with a UV cut-off filter (  $\lambda > 420$  nm). The gas products were analyzed periodically through a gas chromatograph (GC-9790 II ) with a TCD detector. 5mg samples, 0.05g ErB or RhB and 28 $\mu$ L H<sub>2</sub>PtCl<sub>6</sub> solution (1g H<sub>2</sub>PtCl<sub>6</sub> dissolved in 40ml water, 5 wt% Pt) were used in the tests. In order to eliminate the mistake of the added amount of sacrifice reagent in parallel experiments, about 1L TEOA solution (3ml TEOA and 1L deionized water) and methanol solution (10ml methanol and 1L deionized water) was prepared before test. Each test needs 100ml solution and the tests of various amounts of ErB were also done.

The apparent quantum efficiency (QE) was measured at 420nm using the following equation:

$$\eta = \frac{2 \times \text{the number of evolved hydrogen molecules}}{\text{the number of incident photons}} * 100\%$$

## Section 3. Characterization Section

Zeta potential of the samples was measured by ZETASIZER Nano-ZS980 from Malvern Instruments. Powder X-ray diffraction (Rigaku Ultima IV) was used to characterize the crystallinity and chemical composition of the materials studied. SEM images were gained by Hitachi S4700. TEM and HR-TEM images were taken on a FEI Tecnai G<sup>2</sup>F30 transmission electron microscopy. The photoluminescence (PL, FLS980) emission spectra of samples were tested to investigate the recombination of photo-generated electron-hole pairs and UV-vis diffuse reflectance spectroscopy (DRS, Cary 5000) was used to measure the light absorption of the samples.

**Table S1.** Summary of recent reports on MOF-based photocatalysts.

| Group                        | Time | Photocatalyst | Co-catalyst                      | Light source    | Sacrificial reagent | Photosensitizer                       | H <sub>2</sub> production rate(umol/g/h) | Turnover number         |
|------------------------------|------|---------------|----------------------------------|-----------------|---------------------|---------------------------------------|------------------------------------------|-------------------------|
| He et al <sup>s1</sup>       | 2014 | Zr-MOF        | Pt                               | $\lambda > 420$ | TEOA                | RhB                                   | 116.1                                    | 2.3 <sup>a</sup>        |
| Yuan et al <sup>s2</sup>     | 2015 | Zr-MOF        | Pt                               | $\lambda > 420$ | Methanol            | ErB                                   | 460                                      | 17.4 <sup>b</sup>       |
| Xiao et al <sup>s3</sup>     | 2016 | Zr-MOF        | Pt                               | $\lambda > 380$ | TEOA                | None                                  | 257.38                                   | 1.8 <sup>a</sup>        |
| Silva et al <sup>s4</sup>    | 2010 | Zr-MOF        | Pt                               | UV              | Methonal            | None                                  | ~740 (only active for 1h)                | — <sup>c</sup>          |
| Horiuchi et al <sup>s5</sup> | 2012 | Ti-MOF        | Pt                               | $\lambda > 420$ | TEOA                | None                                  | <400                                     | <1.6 <sup>a</sup>       |
| Pullen et al <sup>s6</sup>   | 2013 | Zr-MOF        | [FeFe]-(dc-bdt)(CO) <sub>6</sub> | Blue LED 470 nm | Ascorbate           | [Ru(bpy) <sub>3</sub> ] <sup>2+</sup> | ~350                                     | — <sup>d</sup>          |
| Wen et al <sup>s7</sup>      | 2014 | Cr-MOF        | Pt                               | $\lambda > 420$ | TEOA                | RhB                                   | 580                                      | 7.5 <sup>e</sup>        |
| In this work                 | 2017 | Zr-MOF/GOWU6N | Pt                               | $\lambda > 420$ | TEOA                | ErB                                   | 21205.3/41396.4                          | 82.8/161.7 <sup>a</sup> |

<sup>a</sup> The turnover number of per hour was calculated by the equation of  $TON = n(H_2)/n(Pt)$  based on Pt particles, the amount of H<sub>2</sub> was obtained according to the Experimental section of the cited papers based on the amount of practical used photocatalysts, <sup>b</sup> the data was obtained according to a 18h period test described by the author. <sup>c</sup> the specific amount of Pt was not described and <sup>d</sup> the co-catalyst was not Pt particles. <sup>e</sup> TON was corresponding to the maximum H<sub>2</sub> generation rate.

## References

- (S1) He, J.; Wang, J.; Chen, Y.; Zhang, J.; Duan, D.; Wang, Y.; Yan, Z. *Chem. Commun.* **2014**, 50, 7063.
- (S2) Yuan, Y.; Yin, L.; Cao, S.; Xu, G.; Li, C.; Xue, C. *Appl. Catal. B-Environ.* **2015**, 168-169, 572
- (S3) Xiao, J.; Shang, Q.; Xiong, Y.; Zhang, Q.; Luo, Y.; Yu, S.; Jiang, H. *Angew. Chem. Int. ed.* **2016**, 55, 1.

(S4) Silva, C. G.; Luz, I.; Xamena, F.; Corma, A.; Garc, H. *Chem. Eur. J.* **2010**, *16*, 11133.

(S5) Horiuchi, Y.; Toyao, T.; Saito, M.; Mochizuki, K.; Iwata, M.; Higashimura, H.; Anpo, M.; Matsuoka, M. *J. Phys. Chem. C* **2012**, *116*, 20848

(S6) Pullen, S.; Fei, H.; Orthaber, A.; Cohen, S. M.; Ott, S. *J. Am. Chem. Soc.* **2013**, *135*, 16997

(S7) Wen, M.; Mori, K.; Kamegawa, T.; Yamashita, H.; *Chem. Commun.* **2014**, *50*, 11645.

(S8) Li, D.; Wu, S.; Wang, F.; Jia, S.; Liu, Y.; Han, X.; Zhang, L.; Zhang, S. Wu, Y. *Mater.s Lett.* **2016**, *178*, 48.

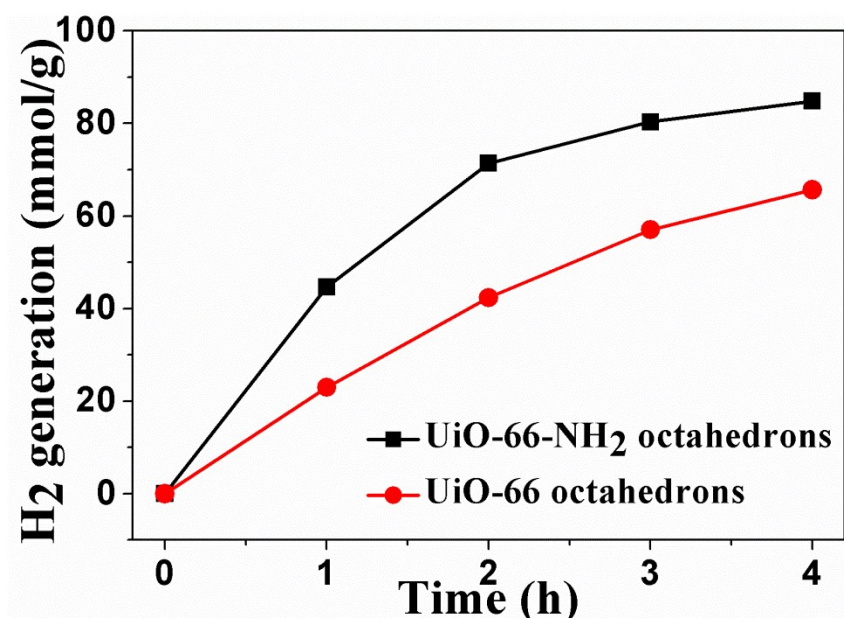

**Figure S1.** H<sub>2</sub> generation abilities of UiO-66-NH<sub>2</sub> and UiO-66 under the system of 0.05g ErB as sensitizer, TEOA as the sacrifice agent and Pt as co-catalyst.

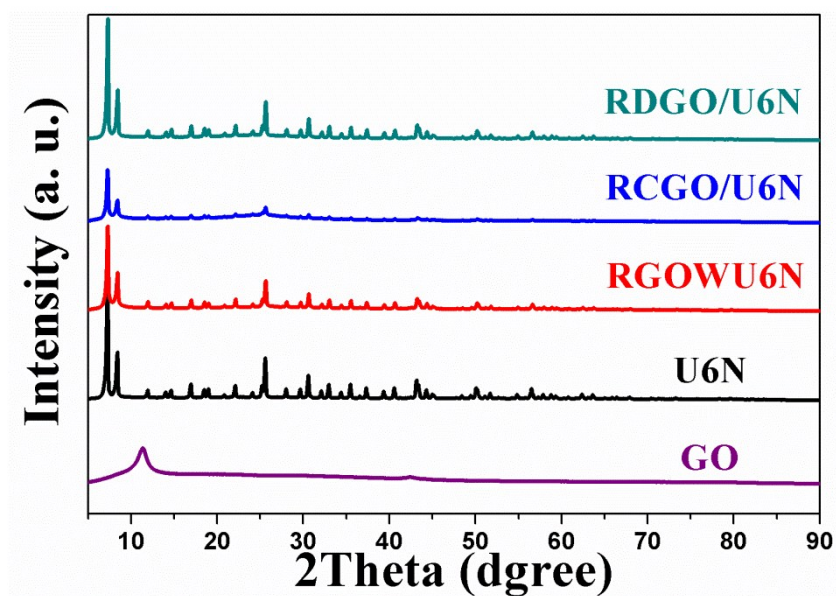

**Figure S2.** XRD patterns of the prepared samples.

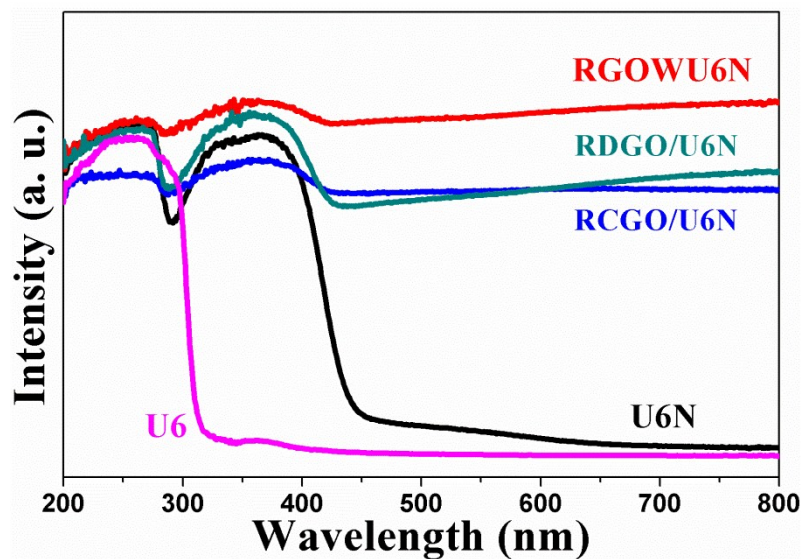

**Figure S3.** UV-vis diffuse reflectance spectra for UiO-66 octahedrons, UiO-66-NH<sub>2</sub> octahedrons, 50wt%RDGO/U6N, 50wt%RCGO/U6N and 50wt%RGOWU6N.

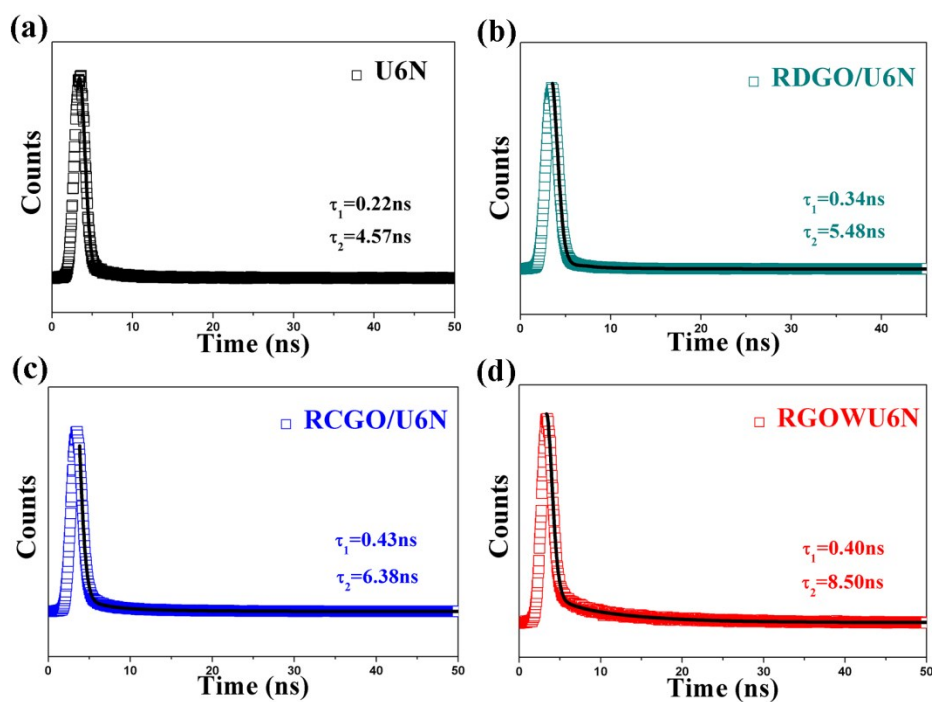

**Figure S4.** Decay and corresponding fit curves for UiO-66-NH<sub>2</sub> octahedrons (a), 50wt%RDGO/U6N (b), 50wt%RCGO/U6N (c) and 50wt%RGOWU6N (d).



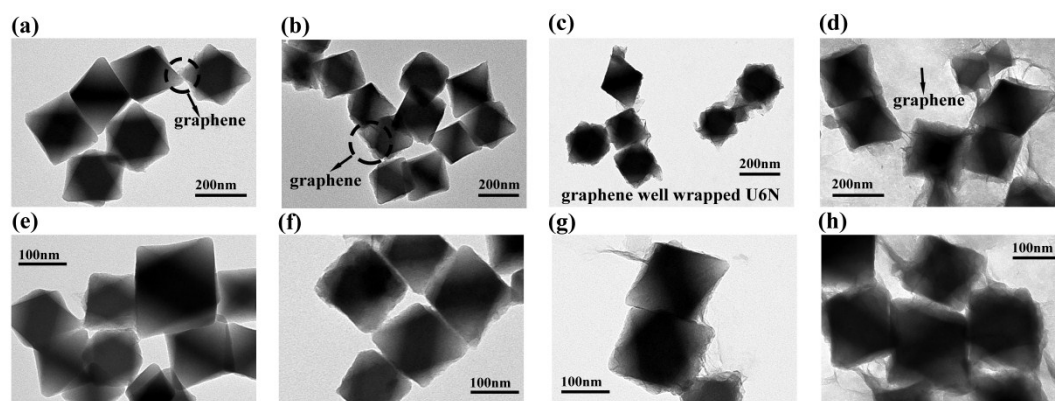

**Figure S5.** TEM images of RGOWU6N 1wt% (a) (e), 10wt% (b) (f), 50wt% (c) (g) and 200wt% (d) (h).

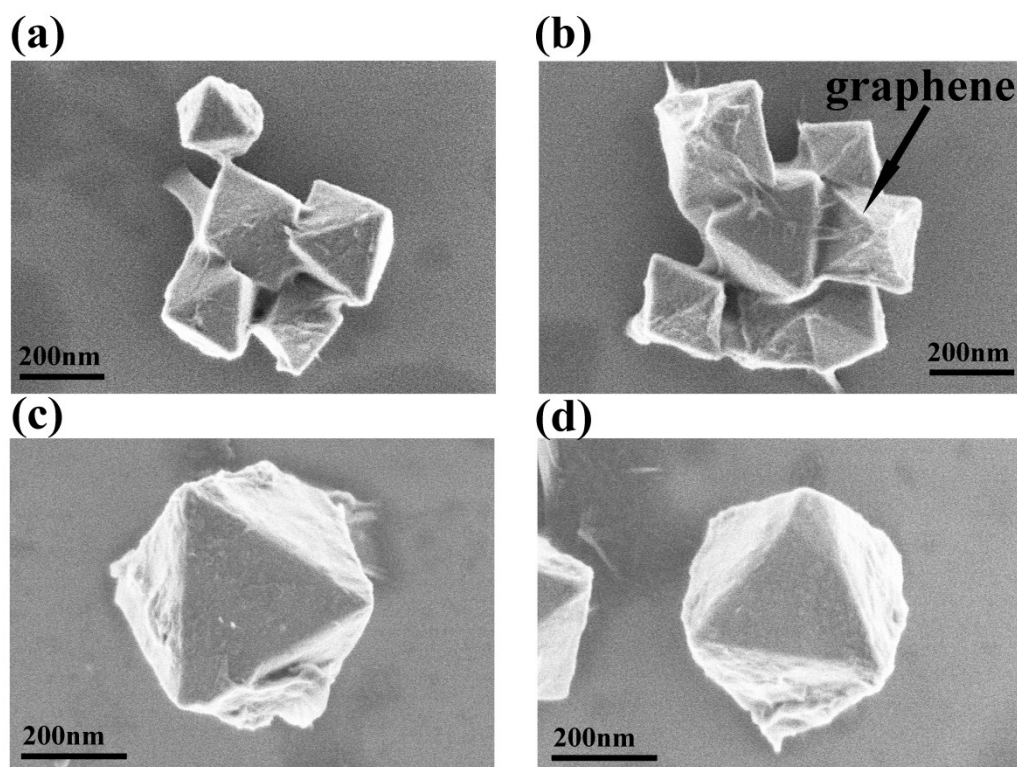

**Figure S6.** SEM images of 50wt% RGOWU6N.

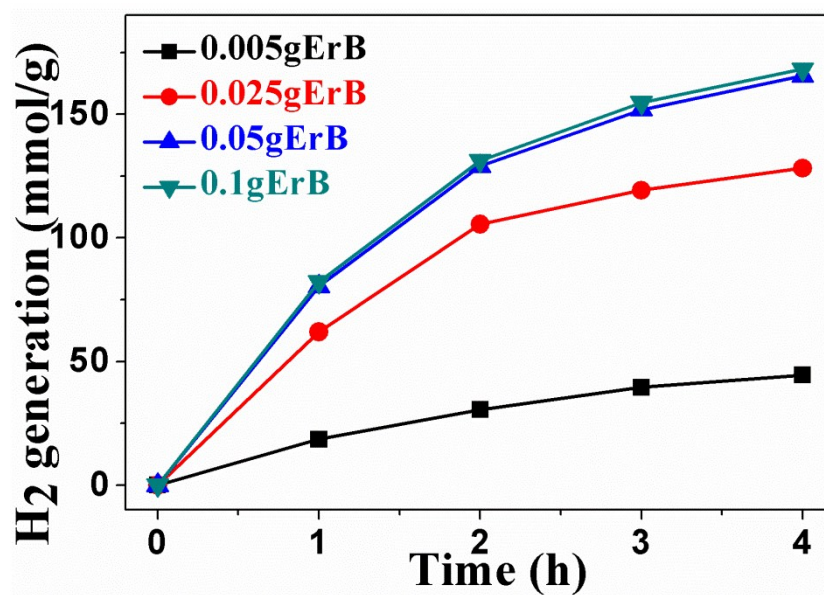

**Figure S7.** Water splitting performance with various amounts of ErB catalyzed by 50wt% RGOWU6N.

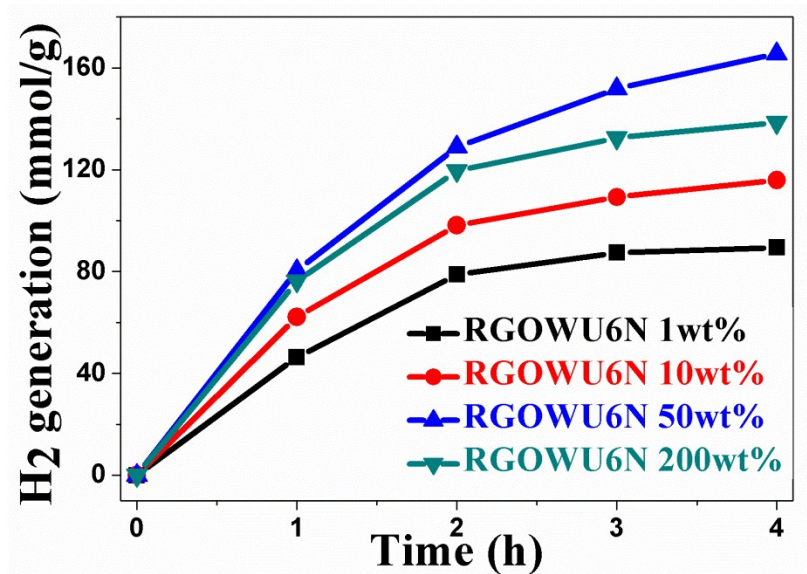

**Figure S8.** H<sub>2</sub> generation performance catalyzed by 1wt%, 10wt%, 50wt% and 200wt% RGOWU6N

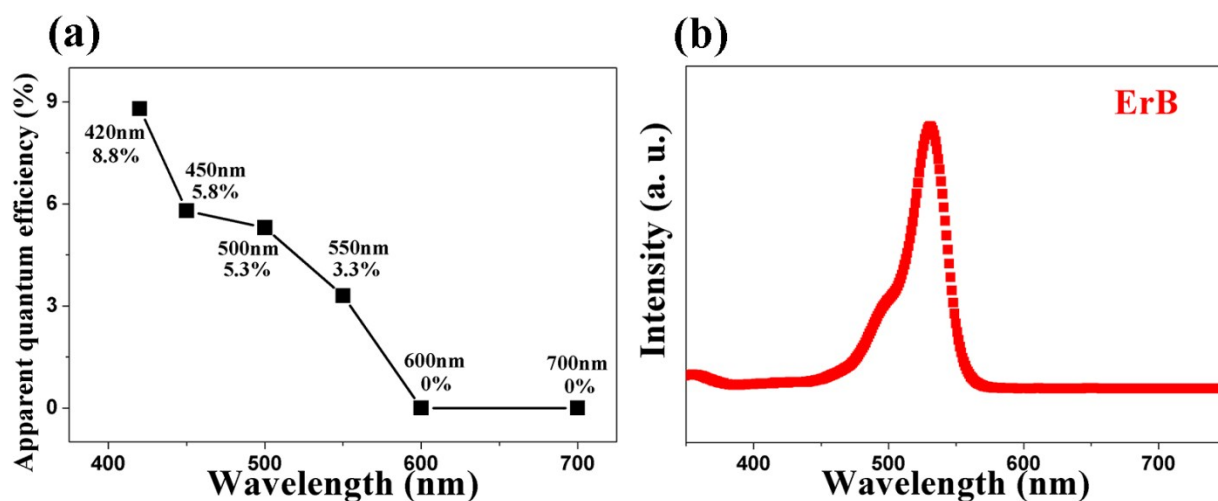

**Figure S9.** Quantum yield tests of 50wt% RGOWU6N (a) and UV-vis spectra of ErB (b).

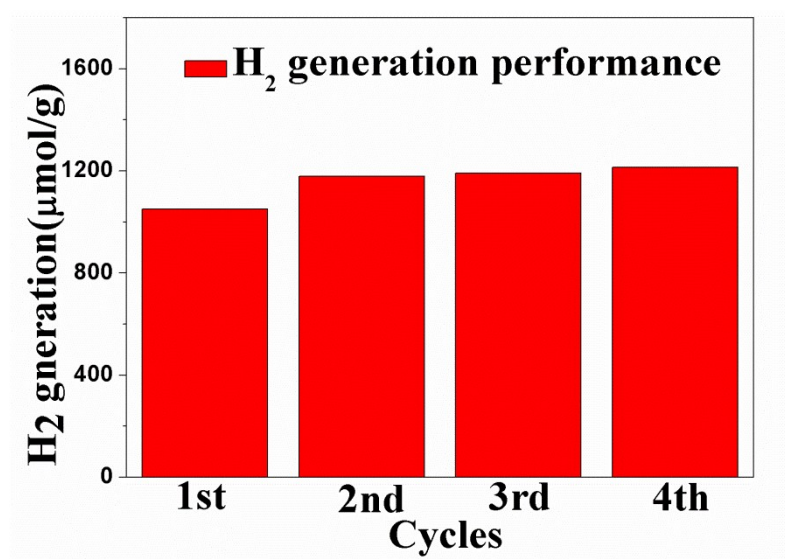

**Figure S10.** The recyclability of 50wt%RGOWU6N without Pt-cocatalyst to illustrate the stability of the designed structure.

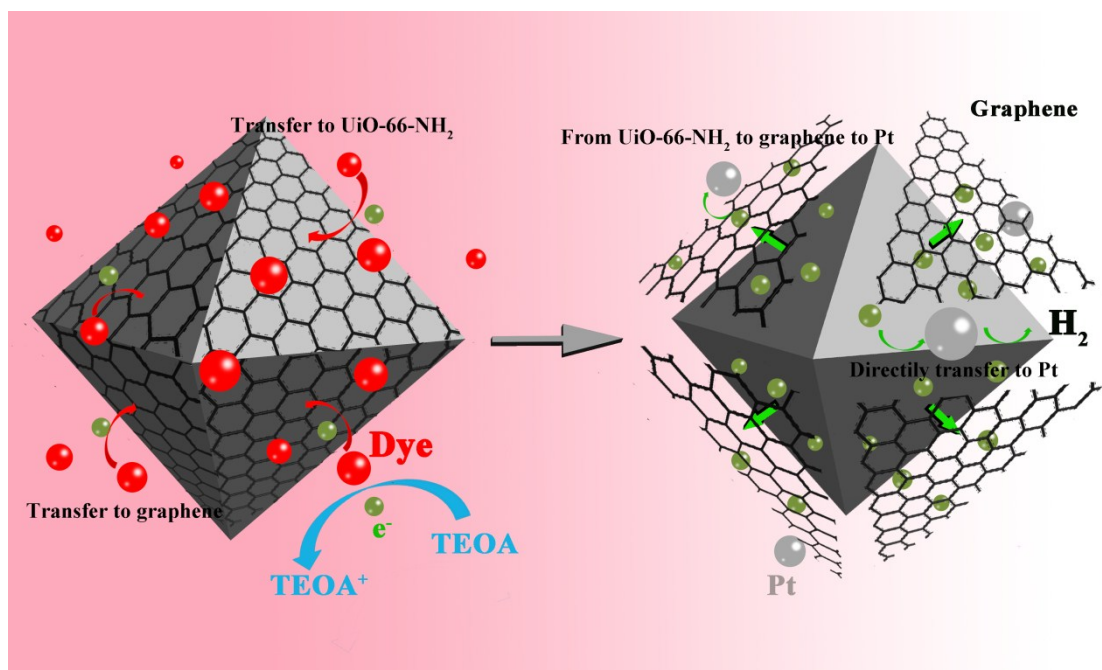

**Figure S11.** The proposed mechanism of multiple faces electron transfer for RGOWU6N.

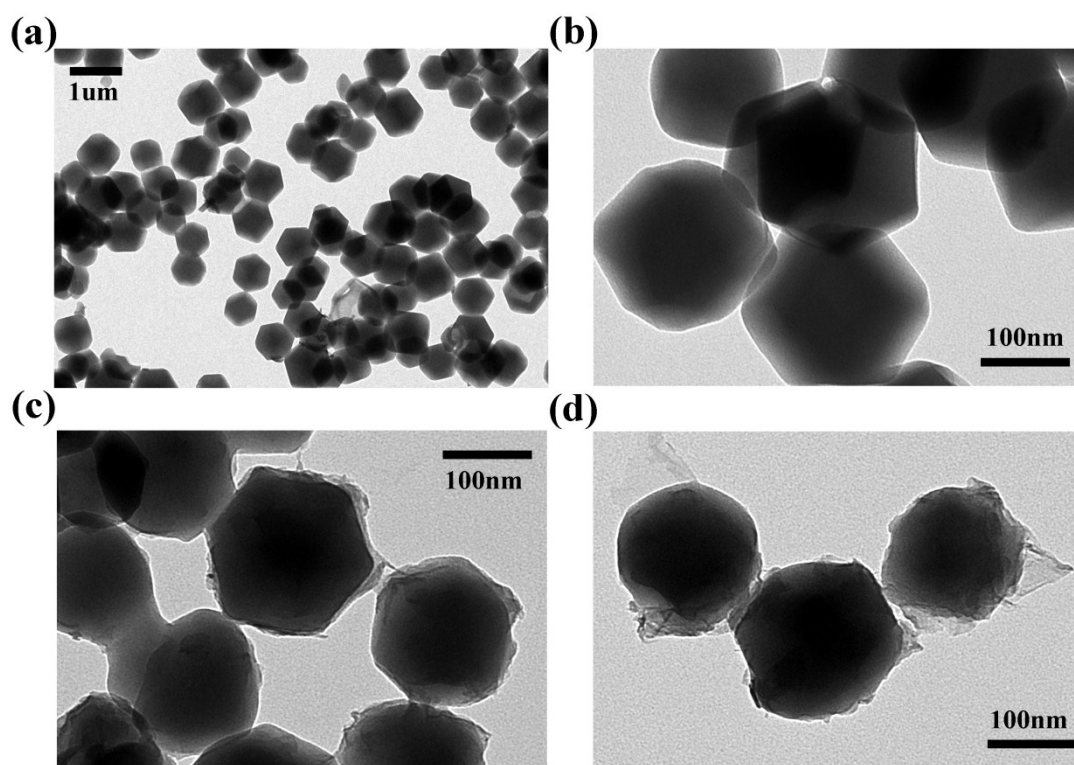

**Figure S12.** TEM images of ZIF-8 (a), (b) and graphene wrapped ZIF-8 (c), (d).
